# Supplementary material
Source: publisher figshare collection journal article supplement (https://frontiersin.figshare.com/ndownloader/files/21746403)
Supplement: Supplementary file 1 [file 21746403]

### Appendix 3. Questionnaire for teachers at the start of the action research project

This questionnaire aims to learn more about your views on teaching expressive music performance. All responses will be treated with confidentiality. Thank you very much in advance for your help.

#### Part 1

Participant Number:

Male/Female

Principal instrument:

Instrument(s) taught:

**Please tick the appropriate box(es):**

I have been teaching instrumental music lessons

|             |             |               |             |          |
|-------------|-------------|---------------|-------------|----------|
| 1 – 4 years | 5 - 9 years | 10 – 14 years | 15 - 19 yrs | ≥ 20 yrs |
|-------------|-------------|---------------|-------------|----------|

My students are aged

|           |            |             |             |          |
|-----------|------------|-------------|-------------|----------|
| 5 - 6 yrs | 7 – 11 yrs | 11 - 16 yrs | 16 – 18 yrs | > 18 yrs |
|-----------|------------|-------------|-------------|----------|

#### Part 2

1. How do you tend to teach expressive music performance to children?
2. What are the issues or questions that you encounter when teaching expressive music performance to children?

**Part 3.**

3. Which methods did your instrumental teacher(s) use for improving your expressiveness? Please tick all options that apply.

|                                                            | Before University/Music College | At University/Music College |
|------------------------------------------------------------|---------------------------------|-----------------------------|
| Modeling – teacher playing for you                         |                                 |                             |
| Listening to recordings in lessons                         |                                 |                             |
| Asking questions & discussing the character of the music   |                                 |                             |
| Gestures & movements to explore the character of the music |                                 |                             |
| Thinking about projecting the performance for an audience  |                                 |                             |
| Discussing the structure of the music                      |                                 |                             |
| Singing                                                    |                                 |                             |
| Visual imagery                                             |                                 |                             |
| Analysis                                                   |                                 |                             |
| Listening to recordings at home                            |                                 |                             |
| My teacher did not teach expressive performance.           |                                 |                             |
| Other:                                                     |                                 |                             |

4. In your experience as teacher, which methods do you find most effective for improving your pupils' expressiveness in music performance?

|                                                                 |  |
|-----------------------------------------------------------------|--|
| I have not taught about expressive performance yet              |  |
| Modeling - playing for a student                                |  |
| Listening to recordings in lessons                              |  |
| Asking questions & discussing the character of the music        |  |
| Gestures & movements to explore the character of the music      |  |
| Teaching the student to project the performance for an audience |  |
| Discussing the structure of the music                           |  |
| Singing                                                         |  |
| Visual imagery                                                  |  |
| Analysis                                                        |  |
| Listening to recordings at home                                 |  |
| Modeling – playing for a student                                |  |
| Other:                                                          |  |

5. The presentation proposed dialogic teaching as an instructional strategy.  
On a scale from 1-10 please rate your estimated effectiveness of this method.

I think dialogic teaching could be an effective instructional strategy

Not at all \_\_\_\_\_ Definitely

1                      2                      3                      4                                      5                      6                      7

6. Could you explain the reason for your rating please?
7. What other method do you think might be effective?

8. What would you like to get out of the action research project this term?

Thank you very much for your time and help!
